# Supplementary material
Source: ML conference proceedings conference paper supplement (https://openaccess.thecvf.com/content/CVPR2021/html/Dai_SPSG_Self-Supervised_Photometric_CVPR_2021_paper.html)
Supplement: Supplementary file 2 [file Dai_SPSG_Self-Supervised_Photometric_CVPR_2021_supplemental.zip]

Archive with 2 entries (2 files):
- 00490-supp.pdf
- spsg.mp4
